# Supplementary material for: Fungal Methane Production Controlled by Oxygen Levels and Temperature
Source: Preprints.org preprint supplement (doi:10.20944/preprints202402.0144.v1), 2024-02-02
Supplement: Supplementary file 1 [file supplementary]

# Supplementary information

Fungal Methane Production Controlled by Oxygen Levels and Temperature

Moritz Schroll 1*, Katharina Lenhart 2,3, Thomas Bender 1, Piet Hötten 1, Alexander Rudolph 1, Sven Sörensen 1 and Frank Keppler 1,4*

1 Institute of Earth Sciences, Heidelberg University, 69120 Heidelberg, Germany

2 Bingen University of Applied Sciences, Berlinstraße 109, Bingen 55411, Germany

3 Centre for Organismal Studies (COS), Im Neuenheimer Feld 230, 69120 Heidelberg, Germany

4 Heidelberg Center for the Environment (HCE), Heidelberg University, 69120 Heidelberg, Germany

***** Correspondence: moritz.mchroll@geow.uni-heidelberg.de and frank.keppler@geow.uni-heidelberg.de

Text S1. Oxygen and temperature dependency of CO2 mixing ratios during fungal incubations

During all fungal incubations, CO2 mixing ratios within the flasks significantly increased to up to 35% (*L. sulphureus* grown on pine wood at 27°C), indicating the metabolic activity of the investigated fungi (Figure S1). Due to logistic constraints, CO2 mixing ratios could not be sampled at high resolution as for CH4 or O2 mixing ratios. Nonetheless, it was evident that CO2 mixing ratios increased at a considerably higher rate when O2 was present in the flasks, compared to conditions where O2 had been previously consumed by the fungi (e.g., for *P. sapidus* grown on pine wood that showed CO2 emission rates of 0.39 mmol h-1 when O2 was present, while rates accounted for 0.01 mmol h-1 when O2 was consumed prior; Figures S1C, F, I). However, CO2 levels continued to rise even after O2 depletion, however at a slower rate, suggesting reduced metabolic activity by the fungi (e.g., Figure S1C). This observation aligns with findings from [31] which demonstrated that basidiomycetes also emit CO2 in environments with low to no measurable O2.

Temperature also had a noticeable effect on fungal CO2 emissions. Incubations at 17°C always resulted in smaller CO2 increases compared to those at 27 or 40°C, regardless of the fungal species or growth medium (e.g., for *P. sapidus* grown on pine wood, where CO2 emission rates accounted for 0.39 mmol h-1 and 0.16 mmol h-1 at temperatures of 27 °C and 17°C, respectively). The difference in the rate of increase in fungal CO2 emissions was particularly pronounced for *L. sulphureus* grown on pine wood, as opposed to *P. sapidus* grown on the same medium. This suggests that the metabolic activity of *L. sulphureus* was more temperature-dependent than that of *P. sapidus*.

In contrast to fungal incubations, CO2 mixing ratios of control incubations (explained in more detail in Text S2) showed relatively small increases across different temperatures, indicating that CO2 emission were closely associated with fungal metabolic activity, similarly as reported by [17,18].


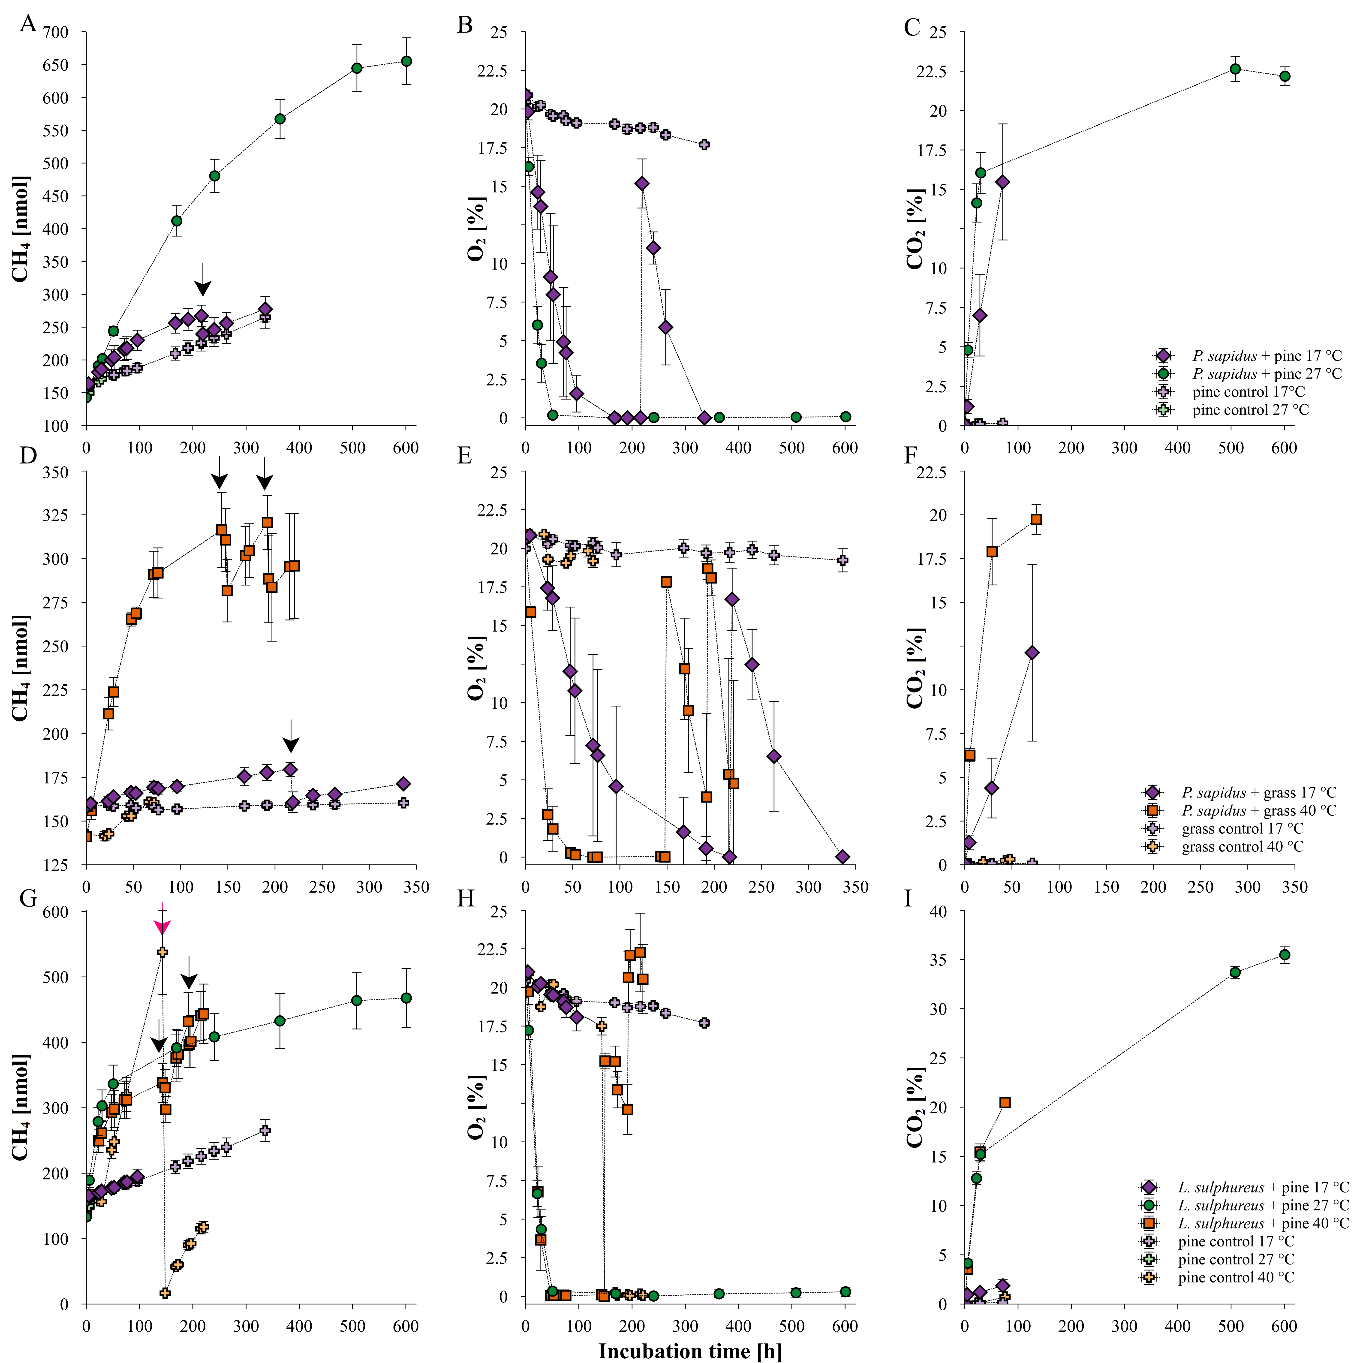


Figure S1: Changes of CH₄ amounts as well as O₂ and CO2 levels in the flasks during incubation of A), B), C) *L. sulphureus* grown on pine wood at 17, 27, and 40 °C, D), E), F) *P. sapidus* grown on pine wood at 17 and 27 °C and G), H), I) *P. sapidus* grown on grass at 17 and 40 °C. Black arrows indicate the points of O₂ addition to the individual flasks containing fungi, while pink arrows indicate O2 removal by flushing of the incubation flask with helium. Data points represent the arithmetic mean and standard deviation of replicate experiments (n = 3 to 4).

Text S2. Changes in CH4, O2 and CO2 levels during incubation of pine wood and grass controls

Figure S2 displays the changes in CH4 levels, as well as O2 and CO2 concentrations, during control incubations of pine wood at 17, 27, and 40°C (A, B, C) and grass at 17°C and 27°C (D, E, F). Both pine wood and grass controls exhibited an increase in CH4 levels, which increased with temperature. For pine wood controls, the highest CH4 increase rate was observed at 40°C (3.26 ± 0.53 nmol h-1), surpassing the rates at 27°C (0.91 ± 0.09 nmol h-1) and 17°C (0.30 ± 0.05 nmol h-1). For grass controls a similar trend was observed with higher CH4 increase rates at 27°C (0.31 ± 0.01 nmol h-1) compared with 17°C (0.01 nmol h-1). Although CH4 levels rose within the flasks, it is noteworthy that increases were 0.5 to 14 times higher in the presence of either of the two fungal species grown on the respective substrates and temperature. Measurements for pine wood controls at 40°C were conducted with and without O2 (Fig. S2A), with the O2-free treatment's headspace being replaced by helium. Notably, CH4 formation rates in the O2-free control were 60% lower than those in the presence of O2. The reason for this observation is currently still unclear and should be addressed in future research.

A similar trend was noted for O2 and CO2 mixing ratios during the incubation of controls. Oxygen concentrations slightly declined for the pine wood controls, more so at 40°C (0.02 mmol h-1) compared with 17°C (0.01 mmol h-1), while CO2 concentrations increased at a higher rate at 40°C (0.006 mmol h-1) than at 27°C (0.002 mmol h-1) and 17°C (0.001 mmol h-1). During the incubation of grass controls only negligible changes in O2 mixing ratios were observed, while CO2 increased at a higher rate at 27°C (0.003 mmol h-1) compared to 17°C (0.0003 mmol h-1). Rates were up to 18 times lower when compared to incubation with fungi for O2 consumption rates and between 8 to 390 times lower when compared to CO2 emissions for the respective substrate and fungi. Like in the fungi incubation experiments, the substrates were sterilized before incubation. Thus, the temperature dependent changes in CH4 levels, along with the much smaller changes in O2 and CO2 mixing ratios point to an abiotic formation of CH4 and CO2.

These observations align with findings by [17,18], which also reported a small CH4 production in control media (pine-, spruce-, birch-, beech- and oak wood as well as grass, corn), hinting at a potential abiotic source for this compound. Previous research has linked abiotic CH4 formation to factors such as UV-B radiation (e.g., [47–49]), temperature [49–51], the presence of H2O2 [52], and iron-oxo catalysis (e.g., [53–55]) through the interaction of ROS and iron (II) in the presence of methylated sulfur and nitrogen compounds. Furthermore, [56] demonstrated that, besides CH4 and CO2, other C1 and C2 compounds such as methanol, formate or ethane can be generated from methyl groups in organic matter through iron oxide-mediated methyl radical formation. Nevertheless, the exact mechanisms of the observed abiotic CH4 formation in our control experiments is currently unknown. This this phenomenon demands future investigation, since both the observed abiotic formation of CH4 and CO2 as well as potential formation of other C1 and C2 compounds could have a strong potential to contribute to e.g., to the carbon and nitrogen cycle in various environments.


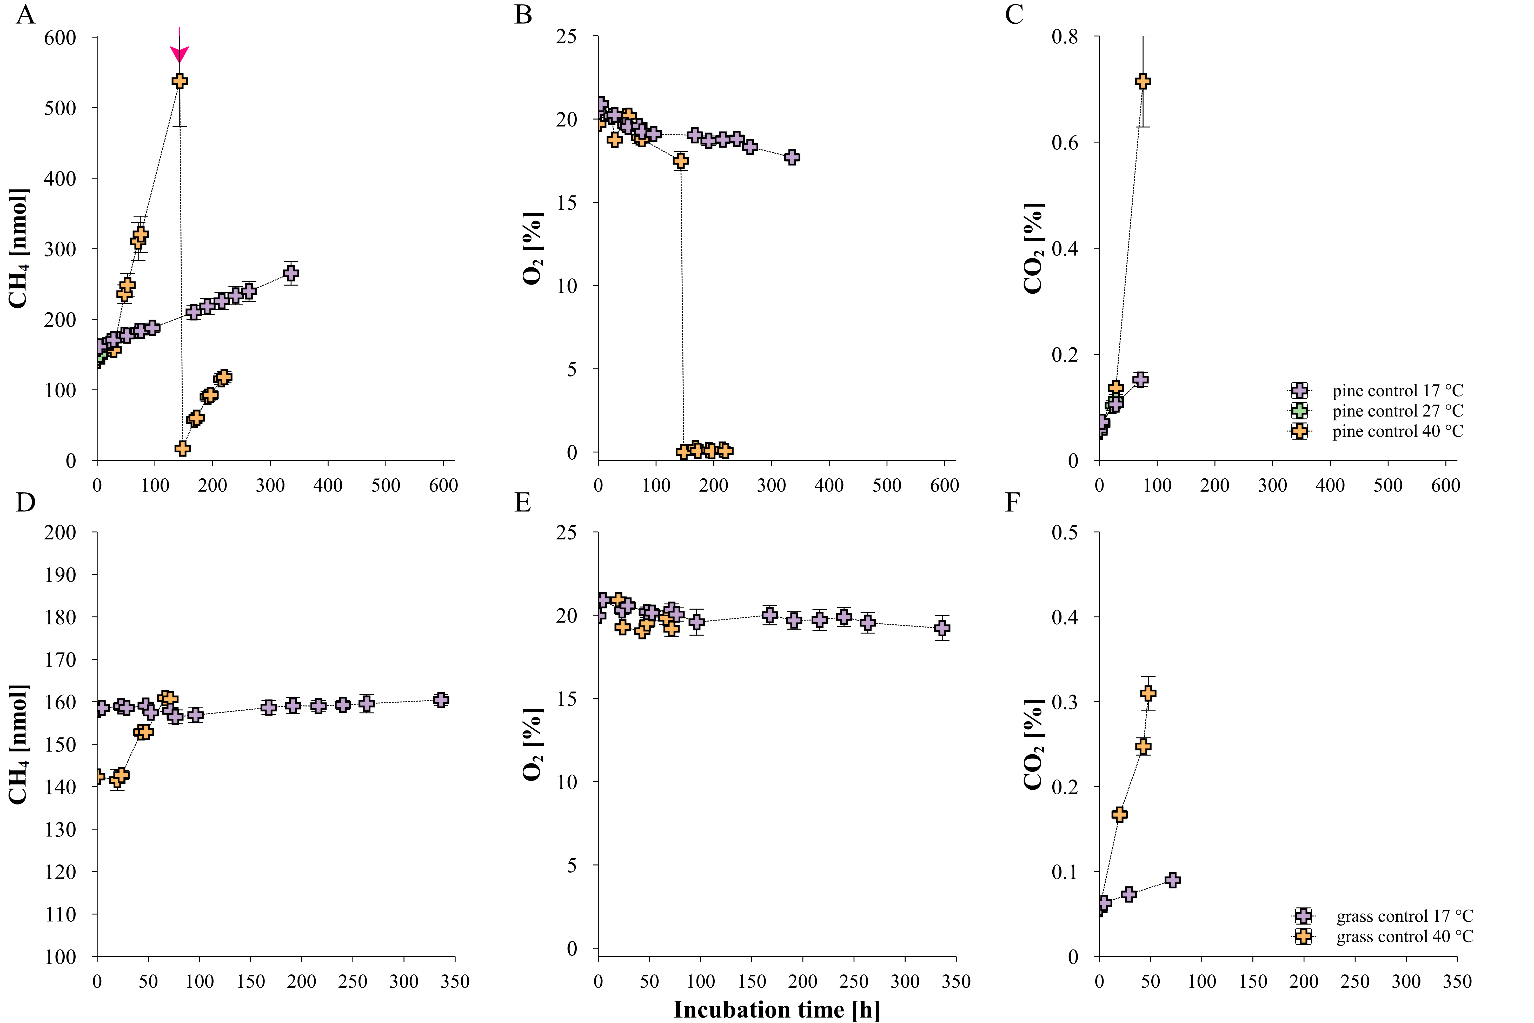


Figure S2: Changes of CH₄ amounts as well as O₂ and CO2 levels in the flasks during control incubation of A), B), C) pine wood at 17, 27, and 40 °C and D), E), F) grass at 17 and 40 °C. The pink arrow indicates O2 removal by flushing of the incubation flask with helium. Data points represent the arithmetic mean and standard deviation of replicate experiments (n = 3 to 4).

**References**

17. Lenhart, K.; Bunge, M.; Ratering, S.; Neu, T.R.; Schüttmann, I.; Greule, M.; Kammann, C.; Schnell, S.; Müller, C.; Zorn, H.; et al. Evidence for Methane Production by Saprotrophic Fungi. *Nat Commun* **2012**, *3*, 1046, doi:10.1038/ncomms2049.

18. Schroll, M.; Keppler, F.; Greule, M.; Eckhardt, C.; Zorn, H.; Lenhart, K. The Stable Carbon Isotope Signature of Methane Produced by Saprotrophic Fungi. *Biogeosciences* **2020**, *17*, 3891–3901, doi:10.5194/bg-17-3891-2020.

31. Mukhin, V.A.; Diyarova, D.K. Eco-Physiological Adaptations of the Xylotrophic Basidiomycetes Fungi to CO2 and O2 Mode in the Woody Habitat. *JoF* **2022**, *8*, 1296, doi:10.3390/jof8121296.

47. McLeod, A.R.; Fry, S.C.; Loake, G.J.; Messenger, D.J.; Reay, D.S.; Smith, K.A.; Yun, B. Ultraviolet Radiation Drives Methane Emissions from Terrestrial Plant Pectins. *New Phytologist* **2008**, *180*, 124–132, doi:10.1111/j.1469-8137.2008.02571.x.

48. Vigano, I.; Weelden, H.V.; Holzinger, R.; Keppler, F.; Röckmann, T. Effect of UV Radiation and Temperature on the Emission of Methane from Plant Biomass and Structural Components. **2008**.

49. Ernst, L.; Barayeu, U.; Hädeler, J.; Dick, T.P.; Klatt, J.M.; Keppler, F.; Rebelein, J.G. Methane Formation Driven by Light and Heat Prior to the Origin of Life and Beyond. *Nat Commun* **2023**, *14*, 4364, doi:10.1038/s41467-023-39917-0.

50. Keppler, F.; Hamilton, J.T.G.; McRoberts, W.C.; Vigano, I.; Braß, M.; Röckmann, T. Methoxyl Groups of Plant Pectin as a Precursor of Atmospheric Methane: Evidence from Deuterium Labelling Studies. *New Phytologist* **2008**, *178*, 808–814, doi:10.1111/j.1469-8137.2008.02411.x.

51. McLeod, A.R.; Fry, S.C.; Loake, G.J.; Messenger, D.J.; Reay, D.S.; Smith, K.A.; Yun, B. Ultraviolet Radiation Drives Methane Emissions from Terrestrial Plant Pectins. *New Phytologist* **2008**, *180*, 124–132, doi:10.1111/j.1469-8137.2008.02571.x.

52. Althoff, F.; Jugold, A.; Keppler, F. Methane Formation by Oxidation of Ascorbic Acid Using Iron Minerals and Hydrogen Peroxide. *Chemosphere* **2010**, *80*, 286–292, doi:10.1016/j.chemosphere.2010.04.004.

53. Comba, P.; Kerscher, M.; Krause, T.; Schöler, H.F. Iron-Catalysed Oxidation and Halogenation of Organic Matter in Nature. *Environ. Chem.* **2015**, *12*, 381, doi:10.1071/EN14240.

54. Benzing, K.; Comba, P.; Martin, B.; Pokrandt, B.; Keppler, F. Nonheme Iron‐Oxo‐Catalyzed Methane Formation from Methyl Thioethers: Scope, Mechanism, and Relevance for Natural Systems. *Chemistry A European J* **2017**, *23*, 10465–10472, doi:10.1002/chem.201701986.

55. Althoff, F.; Benzing, K.; Comba, P.; McRoberts, C.; Boyd, D.R.; Greiner, S.; Keppler, F. Abiotic Methanogenesis from Organosulphur Compounds under Ambient Conditions. *Nat Commun* **2014**, *5*, 4205, doi:10.1038/ncomms5205.

56. Hädeler, J.; Velmurugan, G.; Lauer, R.; Radhamani, R.; Keppler, F.; Comba, P. Natural Abiotic Iron-Oxido-Mediated Formation of C 1 and C 2 Compounds from Environmentally Important Methyl-Substituted Substrates. *J. Am. Chem. Soc.* **2023**, jacs.3c06709, doi:10.1021/jacs.3c06709.
